# Supplementary material
Source: Springer Nature journal article supplement (https://www.springermedizin.de/resource/supplementary/40478_2014_128_MOESM7_ESM.pdf/25658220)

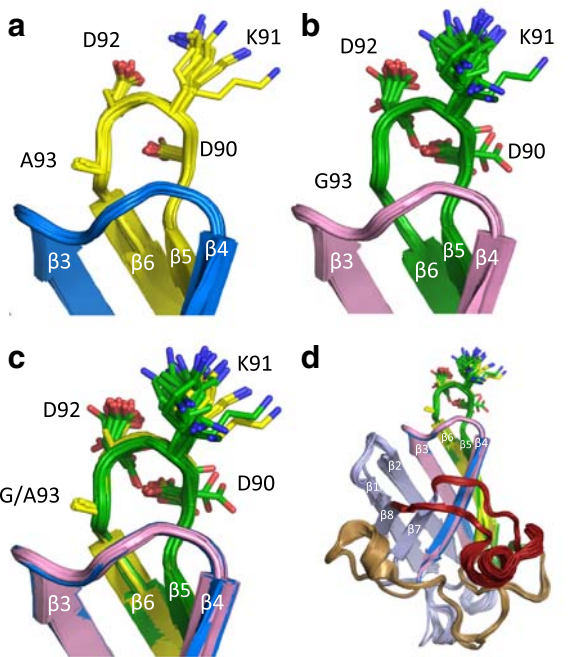

Supplement: MOESM7 [file 25658220]
